# Supplementary material for: Spectrum of Response to Platinum and PARP Inhibitors in Germline BRCA–Associated Pancreatic Cancer in the Clinical and Preclinical Setting
Source: PubMed Central journal article supplement — Cancer Discov. 2023 Jul 14;13(8):1826–43. doi: 10.1158/2159-8290.CD-22-0412 (PMC10401074; doi:10.1158/2159-8290.cd-22-0412), 2023-07-14
Supplement: cd-22-0412_supplementary_table_1_suppst1.pdf [file cd-22-0412_supplementary_table_1_suppst1.pdf]

**Supplementary table 1 – In vivo, EVOG and clinical response**

| SPC_ID  | Treatment | Clinical response to treatment at PDX generation | EVOG score | In-vivo response (treatment/control) |
|---------|-----------|--------------------------------------------------|------------|--------------------------------------|
| SPC_143 | cisplatin | No                                               | 53.7       | 112                                  |
| SPC_126 | cisplatin | No                                               | 8.5        | 115                                  |
| SPC_187 | cisplatin | No                                               | 8          | 115                                  |
| SPC_291 | cisplatin | No                                               | 21.5       | 76                                   |
| SPC_185 | cisplatin | No                                               | 32         |                                      |
| SPC_265 | cisplatin | No                                               | 49         |                                      |
| SPC_375 | cisplatin | No                                               | 29         |                                      |
| SPC_421 | cisplatin | No                                               | 32         |                                      |
| SPC_418 | cisplatin | No                                               | 14         |                                      |
| SPC_135 | cisplatin | No                                               | 66         |                                      |
| SPC_321 | cisplatin | No                                               | 56         |                                      |
| SPC_259 | cisplatin | No                                               | 69         | 41                                   |
| SPC_145 | cisplatin | Yes                                              | 66.5       | 84                                   |
| SPC_123 | cisplatin | Yes                                              | 87         | 19                                   |
| SPC_203 | cisplatin | Yes                                              | 76.5       | 31                                   |
| SPC_326 | cisplatin | Yes                                              | 69         |                                      |
| SPC_467 | cisplatin | Yes                                              | 100        | 5.9                                  |
| SPC_285 | cisplatin | UNK                                              | 94.8       | 26                                   |
| SPC_143 | PARPi     | No                                               | 26.7       | 215                                  |
| SPC_126 | PARPi     | No                                               | 0          | 125                                  |
| SPC_187 | PARPi     | No                                               | 16         | 120                                  |
| SPC_185 | PARPi     | No                                               | 16         |                                      |
| SPC_265 | PARPi     | No                                               | 49.1       |                                      |
| SPC_421 | PARPi     | No                                               | 37         |                                      |
| SPC_305 | PARPi     | No                                               | 15.1       |                                      |
| SPC_145 | PARPi     | No                                               | 61.1       |                                      |
| SPC_123 | PARPi     | Yes                                              | 63.8       | 61                                   |
| SPC_203 | PARPi     | Yes                                              | 82         |                                      |
| SPC_259 | PARPi     | UKN                                              | 16         | 68                                   |
| SPC_467 | PARPi     | UKN                                              | 100        | 41.9                                 |
